# Supplementary material for: Tobacco Related Attitudes and Behaviours in Relation to Exposure to the Tackling Indigenous Smoking Program: Evidence from the Mayi Kuwayu Study
Source: Int J Environ Res Public Health. 2021 Oct 19;18(20):10962. doi: 10.3390/ijerph182010962 (PMC8535551; doi:10.3390/ijerph182010962)
Supplement: Supplementary file 1 [file ijerph-18-10962-s001.zip › ijerph-1293154-supplementary.pdf]

# Supplementary tables

Table S1. Smoking-related outcomes in the total sample^, overall and by gender and remoteness

|                                                              | Total<br>N=8540<br>% (n) | By gender              |                          | By remoteness                 |                                      |                                      |                          |                               |                           |
|--------------------------------------------------------------|--------------------------|------------------------|--------------------------|-------------------------------|--------------------------------------|--------------------------------------|--------------------------|-------------------------------|---------------------------|
|                                                              |                          | Men<br>N=3285<br>% (n) | Women<br>N=5255<br>% (n) | Major City<br>N=3595<br>% (n) | Inner<br>regional<br>N=2449<br>% (n) | Outer<br>regional<br>N=1579<br>% (n) | Remote<br>N=270<br>% (n) | Very remote<br>N=546<br>% (n) | Missing<br>N=101<br>% (n) |
| Smoking attitudes                                            |                          |                        |                          |                               |                                      |                                      |                          |                               |                           |
| Do you agree that non-smokers miss out on gossip or yarning? |                          |                        |                          |                               |                                      |                                      |                          |                               |                           |
| Not at all                                                   | 59.0 (5042)              | 59.4 (1952)            | 58.8 (3090)              | 59.6 (2144)                   | 61.2 (1498)                          | 60.5 (955)                           | 52.6 (142)               | 46.0 (251)                    | 51.5 (52)                 |
| A little bit                                                 | 16.7 (1425)              | 16.1 (530)             | 17.0 (895)               | 18.2 (656)                    | 15.9 (390)                           | 15.7 (248)                           | 15.2 (41)                | 13.7 (75)                     | 14.9 (15)                 |
| A fair bit / A lot                                           | 15.0 (1282)              | 14.8 (486)             | 15.1 (796)               | 13.9 (500)                    | 13.6 (332)                           | 14.3 (226)                           | 22.6 (61)                | 25.5 (139)                    | 23.8 (24)                 |
| Missing                                                      | 9.3 (791)                | 9.6 (317)              | 9.0 (474)                | 8.2 (295)                     | 9.4 (229)                            | 9.5 (150)                            | 9.6 (26)                 | 14.8 (81)                     | 9.9 (10)                  |
| Do you agree that your community disapproves of smoking?     |                          |                        |                          |                               |                                      |                                      |                          |                               |                           |
| Not at all                                                   | 27.8 (2371)              | 25.9 (852)             | 28.9 (1519)              | 26.7 (959)                    | 26.6 (652)                           | 29.7 (469)                           | 35.6 (96)                | 30.0 (164)                    | 30.7 (31)                 |
| A little bit                                                 | 23.9 (2043)              | 23.0 (756)             | 24.5 (1287)              | 23.1 (829)                    | 24.6 (602)                           | 24.3 (383)                           | 27.4 (74)                | 24.2 (132)                    | 22.8 (23)                 |
| A fair bit / A lot                                           | 36.1 (3085)              | 38.3 (1259)            | 34.7 (1826)              | 39.9 (1435)                   | 36.5 (894)                           | 32.4 (511)                           | 24.4 (66)                | 26.7 (146)                    | 32.7 (33)                 |
| Missing                                                      | 12.2 (1041)              | 12.7 (418)             | 11.9 (623)               | 10.3 (372)                    | 12.3 (301)                           | 13.7 (216)                           | 12.6 (34)                | 19.0 (104)                    | 13.9 (14)                 |
| Do you agree that smoking is not that risky?                 |                          |                        |                          |                               |                                      |                                      |                          |                               |                           |
| Not at all                                                   | 49.3 (4213)              | 46.2 (1518)            | 51.3 (2695)              | 55.7 (2001)                   | 49.0 (1199)                          | 44.3 (699)                           | 42.6 (115)               | 28.4 (155)                    | 34.7 (35)                 |
| A little bit                                                 | 7.0 (594)                | 7.2 (236)              | 6.8 (358)                | 6.0 (217)                     | 7.1 (174)                            | 7.2 (114)                            | 7.8 (21)                 | 10.4 (57)                     | 36.6 (37)                 |
| A fair bit / A lot                                           | 31.7 (2708)              | 34.2 (1124)            | 30.1 (1584)              | 27.8 (998)                    | 32.1 (785)                           | 35.1 (554)                           | 38.1 (103)               | 43.0 (235)                    | 28.7 (29)                 |
| Missing                                                      | 12.0 (1025)              | 12.4 (407)             | 11.8 (618)               | 10.5 (379)                    | 11.9 (291)                           | 13.4 (212)                           | 11.5 (31)                | 18.1 (99)                     | 34.7 (35)                 |
| Smoking behaviours                                           |                          |                        |                          |                               |                                      |                                      |                          |                               |                           |
| Smoking status                                               |                          |                        |                          |                               |                                      |                                      |                          |                               |                           |
| Never smoker                                                 | 40.8 (3488)              | 36.1 (1187)            | 43.8 (2301)              | 43.5 (1564)                   | 39.9 (977)                           | 37.6 (593)                           | 38.1 (103)               | 39.6 (216)                    | 34.7 (35)                 |
| Current smoker                                               | 25.9 (2213)              | 26.6 (874)             | 25.5 (1339)              | 21.8 (784)                    | 25.0 (613)                           | 28.3 (447)                           | 34.8 (94)                | 43.6 (238)                    | 36.6 (37)                 |
| Past smoker                                                  | 33.2 (2839)              | 37.3 (1224)            | 30.7 (1615)              | 34.7 (1247)                   | 35.1 (859)                           | 34.1 (539)                           | 27.0 (73)                | 16.8 (92)                     | 28.7 (29)                 |
| Does anyone smoke in your home or in your car?*              |                          |                        |                          |                               |                                      |                                      |                          |                               |                           |
| No                                                           | 68.4 (5842)              | 69.3 (2277)            | 67.8 (3565)              | 72.7 (2613)                   | 70.2 (1719)                          | 67.9 (1072)                          | 57.0 (154)               | 40.8 (223)                    | 60.4 (61)                 |
| Selected 'inside the home'                                   | 9.3 (798)                | 10.9 (359)             | 8.4 (439)                | 8.2 (294)                     | 9.1 (222)                            | 8.5 (135)                            | 13.3 (36)                | 17.0 (93)                     | 17.8 (18)                 |
| Selected 'outside the home'                                  | 19.4 (1656)              | 16.8 (553)             | 21.0 (1103)              | 17.1 (616)                    | 17.7 (433)                           | 19.9 (314)                           | 28.1 (76)                | 35.5 (194)                    | 22.8 (23)                 |
| Selected 'in the car'                                        | 8.4 (716)                | 8.1 (266)              | 8.6 (450)                | 7.6 (274)                     | 8.8 (216)                            | 8.5 (134)                            | 9.6 (26)                 | 10.3 (56)                     | 9.9 (10)                  |

^ Excludes participants with other gender (N=9) to protect confidentiality.

\* Indicates a question where multiple responses are possible. This means that the column percentages may sum to more than 100%.

**Table S2. Smoking-related outcomes in the total sample<sup>^</sup>, overall and by age group**

|                                                              | Total<br>N=8540<br>% (n) | By age category         |                          |                          |                          |                        |
|--------------------------------------------------------------|--------------------------|-------------------------|--------------------------|--------------------------|--------------------------|------------------------|
|                                                              |                          | 16-24<br>N=898<br>% (n) | 25-34<br>N=1134<br>% (n) | 35-44<br>N=1267<br>% (n) | 45-54<br>N=1637<br>% (n) | ≥55<br>N=3604<br>% (n) |
| Smoking attitudes                                            |                          |                         |                          |                          |                          |                        |
| Do you agree that non-smokers miss out on gossip or yarning? |                          |                         |                          |                          |                          |                        |
| Not at all                                                   | 59.0 (5042)              | 61.0 (548)              | 57.4 (651)               | 54.8 (694)               | 57.0 (933)               | 61.5 (2216)            |
| A little bit                                                 | 16.7 (1425)              | 17.9 (161)              | 20.5 (233)               | 19.4 (246)               | 19.2 (315)               | 13.0 (470)             |
| A fair bit / A lot                                           | 15.0 (1282)              | 13.9 (125)              | 15.1 (171)               | 18.7 (237)               | 15.2 (249)               | 13.9 (500)             |
| Missing                                                      | 9.3 (791)                | 7.1 (64)                | 7.0 (79)                 | 7.1 (90)                 | 8.6 (140)                | 11.6 (418)             |
| Do you agree that your community disapproves of smoking?     |                          |                         |                          |                          |                          |                        |
| Not at all                                                   | 27.8 (2371)              | 36.6 (329)              | 34.0 (385)               | 29.0 (368)               | 28.8 (471)               | 22.7 (818)             |
| A little bit                                                 | 23.9 (2043)              | 29.0 (260)              | 27.8 (315)               | 29.3 (371)               | 25.6 (419)               | 18.8 (678)             |
| A fair bit / A lot                                           | 36.1 (3085)              | 25.7 (231)              | 29.6 (336)               | 32.8 (415)               | 34.6 (567)               | 42.6 (1536)            |
| Missing                                                      | 12.2 (1041)              | 8.7 (78)                | 8.6 (98)                 | 8.9 (113)                | 11.0 (180)               | 15.9 (572)             |
| Do you agree that smoking is not that risky?                 |                          |                         |                          |                          |                          |                        |
| Not at all                                                   | 49.3 (4213)              | 54.5 (489)              | 58.3 (661)               | 56.3 (713)               | 50.0 (819)               | 42.5 (1531)            |
| A little bit                                                 | 7.0 (594)                | 12.1 (109)              | 7.9 (90)                 | 6.9 (87)                 | 7.1 (117)                | 5.3 (191)              |
| A fair bit / A lot                                           | 31.7 (2708)              | 25.2 (226)              | 25.1 (285)               | 27.6 (350)               | 32.1 (526)               | 36.7 (1321)            |
| Missing                                                      | 12.0 (1025)              | 8.2 (74)                | 8.6 (98)                 | 9.2 (117)                | 10.7 (175)               | 15.6 (561)             |
| Smoking behaviours                                           |                          |                         |                          |                          |                          |                        |
| Smoking status                                               |                          |                         |                          |                          |                          |                        |
| Never smoker                                                 | 40.8 (3488)              | 59.6 (535)              | 47.7 (541)               | 38.2 (484)               | 36.0 (590)               | 37.1 (1338)            |
| Current smoker                                               | 25.9 (2213)              | 27.7 (249)              | 31.3 (355)               | 32.8 (415)               | 32.4 (530)               | 18.4 (664)             |
| Past smoker                                                  | 33.2 (2839)              | 12.7 (114)              | 21.0 (238)               | 29.0 (368)               | 31.6 (517)               | 44.5 (1602)            |
| Does anyone smoke in your home or in your car?*              |                          |                         |                          |                          |                          |                        |
| No                                                           | 68.4 (5842)              | 52.1 (468)              | 62.9 (713)               | 68.9 (873)               | 65.4 (1070)              | 75.4 (2718)            |
| Selected 'inside the home'                                   | 9.3 (798)                | 11.7 (105)              | 7.9 (90)                 | 9.1 (115)                | 11.9 (195)               | 8.1 (293)              |
| Selected 'outside the home'                                  | 19.4 (1656)              | 33.1 (297)              | 25.4 (288)               | 19.1 (242)               | 20.2 (330)               | 13.8 (499)             |
| Selected 'in the car'                                        | 8.4 (716)                | 12.9 (116)              | 10.0 (113)               | 7.7 (98)                 | 9.9 (162)                | 6.3 (227)              |

<sup>^</sup> Excludes participants with other gender (N=9) to protect confidentiality.

\* Indicates a question where multiple responses are possible. This means that the column percentages may sum to more than 100%.

**Table S3. Smoking-related outcomes among current smokers^, overall and by gender and remoteness**

|                                                             | Total<br>Current<br>Smoker<br>N=2213<br>% (n) | By gender             |                          | By remoteness                |                                     |                                     |                         |                               |                          |
|-------------------------------------------------------------|-----------------------------------------------|-----------------------|--------------------------|------------------------------|-------------------------------------|-------------------------------------|-------------------------|-------------------------------|--------------------------|
|                                                             |                                               | Men<br>N=874<br>% (n) | Women<br>N=1339<br>% (n) | Major City<br>N=784<br>% (n) | Inner<br>regional<br>N=613<br>% (n) | Outer<br>regional<br>N=447<br>% (n) | Remote<br>N=94<br>% (n) | Very remote<br>N=238<br>% (n) | Missing<br>N=37<br>% (n) |
| <b>Smoking attitudes</b>                                    |                                               |                       |                          |                              |                                     |                                     |                         |                               |                          |
| Do you think your smoking has made you sick?                |                                               |                       |                          |                              |                                     |                                     |                         |                               |                          |
| No                                                          | 36.8 (814)                                    | 36.8 (322)            | 36.7 (492)               | 36.9 (289)                   | 41.1 (252)                          | 36.9 (165)                          | 33.0 (31)               | 25.6 (61)                     | 43.2 (16)                |
| Yes                                                         | 34.9 (773)                                    | 35.8 (313)            | 34.4 (460)               | 35.7 (280)                   | 33.1 (203)                          | 34.0 (152)                          | 38.3 (36)               | 39.1 (93)                     | 24.3 (9)                 |
| Unsure                                                      | 25.9 (574)                                    | 24.8 (217)            | 26.7 (357)               | 25.6 (201)                   | 24.1 (148)                          | 27.3 (122)                          | 26.6 (25)               | 27.7 (66)                     | 32.4 (12)                |
| Missing                                                     | 2.3 (52)                                      | 2.5 (22)              | 2.2 (30)                 | 1.8 (14)                     | 1.6 (10)                            | 1.8 (8)                             | 2.1 (2)                 | 7.6 (18)                      | 43.2 (16)                |
| Do you think your smoking will make you sick in the future? |                                               |                       |                          |                              |                                     |                                     |                         |                               |                          |
| Not at all                                                  | 8.4 (186)                                     | 8.9 (78)              | 8.1 (108)                | 8.7 (68)                     | 8.0 (49)                            | 8.5 (38)                            | 8.5 (8)                 | 6.3 (15)                      | 21.6 (8)                 |
| A little bit                                                | 20.2 (446)                                    | 19.6 (171)            | 20.5 (275)               | 21.6 (169)                   | 21.0 (129)                          | 21.3 (95)                           | 17.0 (16)               | 14.3 (34)                     | 8.1 (3)                  |
| A fair bit / A lot                                          | 55.6 (1231)                                   | 55.7 (487)            | 55.6 (744)               | 55.5 (435)                   | 56.1 (344)                          | 54.4 (243)                          | 58.5 (55)               | 56.7 (135)                    | 51.4 (19)                |
| Unsure                                                      | 14.0 (310)                                    | 13.7 (120)            | 14.2 (190)               | 13.3 (104)                   | 13.7 (84)                           | 14.1 (63)                           | 12.8 (12)               | 16.8 (40)                     | 18.9 (7)                 |
| Missing                                                     | 1.8 (40)                                      | 2.1 (18)              | 1.6 (22)                 | 1.0 (8)                      | 1.1 (7)                             | 1.8 (8)                             | 3.2 (3)                 | 5.9 (14)                      | 21.6 (8)                 |
| Do you want to quit smoking?                                |                                               |                       |                          |                              |                                     |                                     |                         |                               |                          |
| Not at all                                                  | 10.7 (237)                                    | 12.0 (105)            | 9.9 (132)                | 11.6 (91)                    | 11.3 (69)                           | 9.8 (44)                            | 14.9 (14)               | 6.7 (16)                      | 8.1 (3)                  |
| A little bit                                                | 21.7 (480)                                    | 17.8 (156)            | 24.2 (324)               | 21.8 (171)                   | 24.8 (152)                          | 20.4 (91)                           | 14.9 (14)               | 18.5 (44)                     | 21.6 (8)                 |
| A fair bit / A lot                                          | 54.5 (1207)                                   | 55.6 (486)            | 53.8 (721)               | 57.4 (450)                   | 54.0 (331)                          | 55.7 (249)                          | 52.1 (49)               | 46.2 (110)                    | 48.6 (18)                |
| Unsure                                                      | 10.8 (240)                                    | 11.6 (101)            | 10.4 (139)               | 7.7 (60)                     | 8.5 (52)                            | 12.5 (56)                           | 16.0 (15)               | 21.0 (50)                     | 18.9 (7)                 |
| Missing                                                     | 2.2 (49)                                      | 3.0 (26)              | 1.7 (23)                 | 1.5 (12)                     | 1.5 (9)                             | 1.6 (7)                             | 2.1 (2)                 | 7.6 (18)                      | 2.7 (1)                  |
| Why do you want to quit?*                                   |                                               |                       |                          |                              |                                     |                                     |                         |                               |                          |
| Advertising against smoking                                 | 3.2 (71)                                      | 2.3 (20)              | 3.8 (51)                 | 2.9 (23)                     | 3.4 (21)                            | 2.9 (13)                            | --                      | 3.8 (9)                       | 8.1 (3)                  |
| Medical advice                                              | 17.2 (381)                                    | 18.1 (158)            | 16.7 (223)               | 18.5 (145)                   | 20.1 (123)                          | 15.0 (67)                           | 14.9 (14)               | 11.8 (28)                     | 10.8 (4)                 |
| My Health                                                   | 55.5 (1229)                                   | 54.2 (474)            | 56.4 (755)               | 59.1 (463)                   | 53.7 (329)                          | 56.4 (252)                          | 51.1 (48)               | 49.6 (118)                    | 51.4 (19)                |
| Health of my family                                         | 24.1 (533)                                    | 20.3 (177)            | 26.6 (356)               | 25.3 (198)                   | 24.8 (152)                          | 21.9 (98)                           | 19.1 (18)               | 26.1 (62)                     | 13.5 (5)                 |
| Cost                                                        | 48.1 (1064)                                   | 46.7 (408)            | 49.0 (656)               | 52.0 (408)                   | 52.2 (320)                          | 47.2 (211)                          | 35.1 (33)               | 30.3 (72)                     | 54.1 (20)                |
| Pregnancy                                                   | 0.9 (19)                                      | --                    | 1.3 (18)                 | 1.0 (8)                      | 1.3 (8)                             | --                                  | --                      | --                            | 0 (0)                    |
| Too many non-smoking areas                                  | 4.4 (98)                                      | 3.8 (33)              | 4.9 (65)                 | 4.8 (38)                     | 4.9 (30)                            | 4.3 (19)                            | --                      | --                            | 5.4 (2)                  |
| Pressure from family or friends                             | 14.6 (323)                                    | 14.3 (125)            | 14.8 (198)               | 15.6 (122)                   | 14.2 (87)                           | 12.3 (55)                           | 18.1 (17)               | 15.1 (36)                     | 16.2 (6)                 |
| Other                                                       | 6.2 (138)                                     | 5.9 (52)              | 6.4 (86)                 | 7.0 (55)                     | 5.9 (36)                            | 4.5 (20)                            | --                      | 8.4 (20)                      | 8.1 (3)                  |
| Missing or indicated does not want to quit                  | 15.5 (344)                                    | 17.3 (151)            | 14.4 (193)               | 14.5 (114)                   | 14.0 (86)                           | --                                  | 25.5 (24)               | 21.4 (51)                     | 13.5 (5)                 |
| <b>Smoking behaviours</b>                                   |                                               |                       |                          |                              |                                     |                                     |                         |                               |                          |
| How old were you when you started smoking?                  |                                               |                       |                          |                              |                                     |                                     |                         |                               |                          |

|                                                                              |             |            |             |            |            |            |           |            |           |
|------------------------------------------------------------------------------|-------------|------------|-------------|------------|------------|------------|-----------|------------|-----------|
| 1-15 years old                                                               | 53.9 (1193) | 56.2 (491) | 52.4 (702)  | 58.7 (460) | 61.7 (378) | 50.3 (225) | 39.4 (37) | 29.4 (70)  | 62.2 (23) |
| 16-18 years old                                                              | 28.8 (637)  | 24.6 (215) | 31.5 (422)  | 26.1 (205) | 24.6 (151) | 32.0 (143) | 45.7 (43) | 36.1 (86)  | 24.3 (9)  |
| 19-24 years old                                                              | 8.9 (196)   | 9.2 (80)   | 8.7 (116)   | 8.2 (64)   | 6.4 (39)   | 7.8 (35)   | 10.6 (10) | 19.7 (47)  | 2.7 (1)   |
| 25-34 years old                                                              | 3.4 (75)    | 4.5 (39)   | 2.7 (36)    | 2.3 (18)   | 4.2 (26)   | 4.3 (19)   | --        | 4.2 (10)   | 2.7 (1)   |
| ≥35 years old                                                                | 1.9 (42)    | 1.8 (16)   | 1.9 (26)    | 2.6 (20)   | 1.3 (8)    | 2.5 (11)   | --        | --         | 2.7 (1)   |
| Missing                                                                      | 3.2 (70)    | 3.8 (33)   | 2.8 (37)    | 2.2 (17)   | 1.8 (11)   | 3.1 (14)   | 3.2 (3)   | --         | 5.4 (2)   |
| In the past year, have you tried to quit or reduce the amount you smoke?*    |             |            |             |            |            |            |           |            |           |
| Tried to quit smoking                                                        | 44.9 (994)  | 42.2 (369) | 46.7 (625)  | 44.8 (351) | 46.5 (285) | 41.6 (186) | 41.5 (39) | 50.0 (119) | 37.8 (14) |
| Tried to reduce smoking                                                      | 48.4 (1071) | 44.4 (388) | 51.0 (683)  | 53.3 (418) | 50.9 (312) | 49.4 (221) | 34.0 (32) | 31.5 (75)  | 35.1 (13) |
| Have not tried to quit or reduce smoking                                     | 18.0 (399)  | 21.3 (186) | 15.9 (213)  | 17.0 (133) | 17.5 (107) | 17.7 (79)  | 26.6 (25) | 18.1 (43)  | 32.4 (12) |
| Missing                                                                      | 2.8 (62)    | 3.2 (28)   | 2.5 (34)    | 1.9 (15)   | 1.8 (11)   | 2.5 (11)   | 4.3 (4)   | 7.6 (18)   | 32.4 (12) |
| How often do you smoke?                                                      |             |            |             |            |            |            |           |            |           |
| Less than weekly                                                             | 5.2 (115)   | 4.8 (42)   | 5.5 (73)    | 5.2 (41)   | 3.4 (21)   | 4.0 (18)   | --        | 11.3 (27)  | 8.1 (3)   |
| Weekly (not every day)                                                       | 11.4 (252)  | 12.0 (105) | 11.0 (147)  | 9.7 (76)   | 7.5 (46)   | 11.2 (50)  | 21.3 (20) | 23.9 (57)  | 8.1 (3)   |
| Every day                                                                    | 81.5 (1803) | 80.8 (706) | 81.9 (1097) | 83.9 (658) | 87.6 (537) | 83.4 (373) | 70.2 (66) | 58.4 (139) | 81.1 (30) |
| Missing                                                                      | 1.9 (43)    | 2.4 (21)   | 1.6 (22)    | 1.1 (9)    | 1.5 (9)    | 1.3 (6)    | --        | 6.3 (15)   | 2.7 (1)   |
| How many cigarettes do you usually smoke in one day?                         |             |            |             |            |            |            |           |            |           |
| 1-10 cigarettes per day                                                      | 53.1 (1176) | 47.5 (415) | 56.8 (761)  | 51.7 (405) | 50.1 (307) | 51.7 (231) | 69.1 (65) | 63.9 (152) | 43.2 (16) |
| 11-20 cigarettes per day                                                     | 30.3 (670)  | 32.8 (287) | 28.6 (383)  | 32.0 (251) | 35.6 (218) | 32.2 (144) | 14.9 (14) | 13.4 (32)  | 29.7 (11) |
| 21-30 cigarettes per day                                                     | 8.9 (198)   | 11.0 (96)  | 7.6 (102)   | 10.2 (80)  | 7.7 (47)   | 8.3 (37)   | 9.6 (9)   | 8.0 (19)   | 16.2 (6)  |
| ≥31 cigarettes per day                                                       | 2.2 (49)    | 3.0 (26)   | 1.7 (23)    | 2.7 (21)   | 2.9 (18)   | 2.0 (9)    | --        | --         | 0 (0)     |
| Missing or less than daily                                                   | 5.4 (120)   | 5.7 (50)   | 5.2 (70)    | 3.4 (27)   | 3.8 (23)   | 5.8 (26)   | --        | --         | 10.8 (4)  |
| How soon after waking do you usually have your first cigarette?              |             |            |             |            |            |            |           |            |           |
| 5 minutes or less                                                            | 26.5 (587)  | 29.6 (259) | 24.5 (328)  | 27.4 (215) | 25.4 (156) | 26.4 (118) | 23.4 (22) | 26.9 (64)  | 32.4 (12) |
| 6-30 minutes                                                                 | 36.6 (809)  | 34.2 (299) | 38.1 (510)  | 35.3 (277) | 40.5 (248) | 36.2 (162) | 38.3 (36) | 29.4 (70)  | 43.2 (16) |
| 31-60 minutes                                                                | 16.1 (356)  | 16.7 (146) | 15.7 (210)  | 17.2 (135) | 15.7 (96)  | 17.2 (77)  | 14.9 (14) | 12.2 (29)  | 13.5 (5)  |
| 61 or more minutes                                                           | 9.3 (205)   | 8.2 (72)   | 9.9 (133)   | 7.7 (60)   | 9.5 (58)   | 10.3 (46)  | 16.0 (15) | 10.9 (26)  | 0 (0)     |
| Don't smoke every day                                                        | 8.5 (187)   | 7.7 (67)   | 9.0 (120)   | 10.1 (79)  | 7.8 (48)   | 7.4 (33)   | --        | 8.8 (21)   | 8.1 (3)   |
| Missing                                                                      | 3.1 (69)    | 3.5 (31)   | 2.8 (38)    | 2.3 (18)   | 1.1 (7)    | 2.5 (11)   | --        | 11.8 (28)  | 2.7 (1)   |
| Have you ever participated in any Quit Smoking Program, Service or Activity? |             |            |             |            |            |            |           |            |           |
| Not reported                                                                 | 88.5 (1959) | 89.5 (782) | 87.9 (1177) | 86.7 (680) | 85.5 (524) | 91.3 (408) | 91.5 (86) | 95.0 (226) | 94.6 (35) |
| Reported                                                                     | 11.5 (254)  | 10.5 (92)  | 12.1 (162)  | 13.3 (104) | 14.5 (89)  | 8.7 (39)   | 8.5 (8)   | 5.0 (12)   | 5.4 (2)   |

^ Excludes participants with other gender (N=9) to protect confidentiality.

\* Indicates a question where multiple responses are possible. This means that the column percentages may sum to more than 100%.

-- indicates a cell that was suppressed due to small numbers.

**Table S4. Smoking-related outcomes among current smokers<sup>^</sup>, overall and by age group**

|                                                             | Total Current smokers<br>N=2213<br>% (n) | By age group (years)    |                         |                         |                         |                       |
|-------------------------------------------------------------|------------------------------------------|-------------------------|-------------------------|-------------------------|-------------------------|-----------------------|
|                                                             |                                          | 16-24<br>N=249<br>% (n) | 25-34<br>N=355<br>% (n) | 35-44<br>N=415<br>% (n) | 45-54<br>N=530<br>% (n) | ≥55<br>N=664<br>% (n) |
| Smoking attitudes                                           |                                          |                         |                         |                         |                         |                       |
| Do you think your smoking has made you sick?                |                                          |                         |                         |                         |                         |                       |
| No                                                          | 36.8 (814)                               | 42.2 (105)              | 36.6 (130)              | 35.7 (148)              | 35.3 (187)              | 36.7 (244)            |
| Yes                                                         | 34.9 (773)                               | 29.7 (74)               | 32.1 (114)              | 34.5 (143)              | 39.1 (207)              | 35.4 (235)            |
| Unsure                                                      | 25.9 (574)                               | 26.1 (65)               | 28.7 (102)              | 27.2 (113)              | 24.0 (127)              | 25.2 (167)            |
| Missing                                                     | 2.3 (52)                                 | 2.0 (5)                 | 2.5 (9)                 | 2.7 (11)                | 1.7 (9)                 | 2.7 (18)              |
| Do you think your smoking will make you sick in the future? |                                          |                         |                         |                         |                         |                       |
| Not at all                                                  | 8.4 (186)                                | 8.0 (20)                | 7.3 (26)                | 6.0 (25)                | 9.4 (50)                | 9.8 (65)              |
| A little bit                                                | 20.2 (446)                               | 24.5 (61)               | 21.1 (75)               | 21.7 (90)               | 17.5 (93)               | 19.1 (127)            |
| A fair bit / A lot                                          | 55.6 (1231)                              | 53.8 (134)              | 56.6 (201)              | 59.0 (245)              | 57.9 (307)              | 51.8 (344)            |
| Unsure                                                      | 14.0 (310)                               | 12.4 (31)               | 13.5 (48)               | 11.1 (46)               | 13.2 (70)               | 17.3 (115)            |
| Missing                                                     | 1.8 (40)                                 | 1.2 (3)                 | 1.4 (5)                 | 2.2 (9)                 | 1.9 (10)                | 2.0 (13)              |
| Do you want to quit smoking?                                |                                          |                         |                         |                         |                         |                       |
| Not at all                                                  | 10.7 (237)                               | 8.4 (21)                | 8.2 (29)                | 7.0 (29)                | 12.3 (65)               | 14.0 (93)             |
| A little bit                                                | 21.7 (480)                               | 29.3 (73)               | 23.9 (85)               | 21.2 (88)               | 17.9 (95)               | 20.9 (139)            |
| A fair bit / A lot                                          | 54.5 (1207)                              | 43.8 (109)              | 54.9 (195)              | 58.3 (242)              | 58.7 (311)              | 52.7 (350)            |
| Unsure                                                      | 10.8 (240)                               | 16.9 (42)               | 10.4 (37)               | 10.8 (45)               | 9.4 (50)                | 9.9 (66)              |
| Missing                                                     | 2.2 (49)                                 | 1.6 (4)                 | 2.5 (9)                 | 2.7 (11)                | 1.7 (9)                 | 2.4 (16)              |
| Why do you want to quit?*                                   |                                          |                         |                         |                         |                         |                       |
| Advertising against smoking                                 | 3.2 (71)                                 | 2.4 (6)                 | 3.4 (12)                | 3.1 (13)                | 4.3 (23)                | 2.6 (17)              |
| Medical advice                                              | 17.2 (381)                               | 8.8 (22)                | 10.4 (37)               | 11.6 (48)               | 20.9 (111)              | 24.5 (163)            |
| My Health                                                   | 55.5 (1229)                              | 55.0 (137)              | 57.7 (205)              | 55.4 (230)              | 56.2 (298)              | 54.1 (359)            |
| Health of my family                                         | 24.1 (533)                               | 21.7 (54)               | 33.8 (120)              | 35.2 (146)              | 20.6 (109)              | 15.7 (104)            |
| Cost                                                        | 48.1 (1064)                              | 42.6 (106)              | 50.7 (180)              | 50.1 (208)              | 47.5 (252)              | 47.9 (318)            |
| Pregnancy                                                   | 0.9 (19)                                 | 3.2 (8)                 | 1.7 (6)                 | --                      | --                      | --                    |
| Too many non-smoking areas                                  | 4.4 (98)                                 | --                      | 3.1 (11)                | 5.8 (24)                | 4.0 (21)                | 5.7 (38)              |
| Pressure from family or friends                             | 14.6 (323)                               | 12.9 (32)               | 12.7 (45)               | 14.9 (62)               | 15.3 (81)               | 15.5 (103)            |
| Other                                                       | 6.2 (138)                                | 7.2 (18)                | 5.9 (21)                | 7.2 (30)                | 6.4 (34)                | 5.3 (35)              |
| Missing or indicated does not want to quit                  | 15.5 (344)                               | --                      | 13.2 (47)               | --                      | --                      | --                    |
| Smoking behaviours                                          |                                          |                         |                         |                         |                         |                       |
| How old were you when you started smoking?                  |                                          |                         |                         |                         |                         |                       |
| 1-15 years old                                              | 53.9 (1193)                              | 53.0 (132)              | 46.5 (165)              | 51.1 (212)              | 57.7 (306)              | 56.9 (378)            |
| 16-18 years old                                             | 28.8 (637)                               | 38.6 (96)               | 34.9 (124)              | 31.8 (132)              | 24.5 (130)              | 23.3 (155)            |
| 19-24 years old                                             | 8.9 (196)                                | 5.2 (13)                | 12.7 (45)               | 9.6 (40)                | 9.4 (50)                | 7.2 (48)              |

|                                                                              |             |            |            |            |            |            |
|------------------------------------------------------------------------------|-------------|------------|------------|------------|------------|------------|
| 25-34 years old                                                              | 3.4 (75)    | --         | 2.0 (7)    | 2.7 (11)   | 3.6 (19)   | 5.7 (38)   |
| ≥35 years old                                                                | 1.9 (42)    | --         | --         | 1.4 (6)    | 3.0 (16)   | 3.0 (20)   |
| Missing                                                                      | 3.2 (70)    | 3.2 (8)    | --         | 3.4 (14)   | 1.7 (9)    | 3.8 (25)   |
| In the past year, have you tried to quit or reduce the amount you smoke?*    |             |            |            |            |            |            |
| Tried to quit smoking                                                        | 44.9 (994)  | 43.8 (109) | 45.9 (163) | 45.5 (189) | 42.3 (224) | 46.5 (309) |
| Tried to reduce smoking                                                      | 48.4 (1071) | 51.4 (128) | 50.7 (180) | 47.0 (195) | 48.1 (255) | 47.1 (313) |
| Have not tried to quit or reduce smoking                                     | 18.0 (399)  | 16.9 (42)  | 16.6 (59)  | 17.3 (72)  | 20.9 (111) | 17.3 (115) |
| Missing                                                                      | 2.8 (62)    | 1.6 (4)    | 2.8 (10)   | 4.3 (18)   | 1.5 (8)    | 3.3 (22)   |
| How often do you smoke?                                                      |             |            |            |            |            |            |
| Less than weekly                                                             | 5.2 (115)   | 10.8 (27)  | 7.6 (27)   | 4.1 (17)   | 4.7 (25)   | 2.9 (19)   |
| Weekly (not every day)                                                       | 11.4 (252)  | 17.3 (43)  | 15.2 (54)  | 12.8 (53)  | 9.8 (52)   | 7.5 (50)   |
| Every day                                                                    | 81.5 (1803) | 69.1 (172) | 74.4 (264) | 81.9 (340) | 84.3 (447) | 87.3 (580) |
| Missing                                                                      | 1.9 (43)    | 2.8 (7)    | 2.8 (10)   | 1.2 (5)    | 1.1 (6)    | 2.3 (15)   |
| How many cigarettes do you usually smoke in one day?                         |             |            |            |            |            |            |
| 1-10 cigarettes per day                                                      | 53.1 (1176) | 76.7 (191) | 65.6 (233) | 54.5 (226) | 45.1 (239) | 43.2 (287) |
| 11-20 cigarettes per day                                                     | 30.3 (670)  | 10.8 (27)  | 22.8 (81)  | 32.3 (134) | 36.2 (192) | 35.5 (236) |
| 21-30 cigarettes per day                                                     | 8.9 (198)   | 4.4 (11)   | 3.4 (12)   | 6.3 (26)   | 11.3 (60)  | 13.4 (89)  |
| ≥31 cigarettes per day                                                       | 2.2 (49)    | --         | --         | 2.2 (9)    | 2.6 (14)   | 3.0 (20)   |
| Missing or less than daily                                                   | 5.4 (120)   | --         | --         | 4.8 (20)   | 4.7 (25)   | 4.8 (32)   |
| How soon after waking do you usually have your first cigarette?              |             |            |            |            |            |            |
| 5 minutes or less                                                            | 26.5 (587)  | 17.7 (44)  | 23.9 (85)  | 28.4 (118) | 29.1 (154) | 26.5 (176) |
| 6-30 minutes                                                                 | 36.6 (809)  | 21.7 (54)  | 33.8 (120) | 34.2 (142) | 39.4 (209) | 38.6 (256) |
| 31-60 minutes                                                                | 16.1 (356)  | 32.9 (82)  | 16.6 (59)  | 17.3 (72)  | 14.0 (74)  | 16.9 (112) |
| 61 or more minutes                                                           | 9.3 (205)   | 15.7 (39)  | 12.1 (43)  | 8.4 (35)   | 8.3 (44)   | 8.9 (59)   |
| Don't smoke every day                                                        | 8.5 (187)   | 9.6 (24)   | 8.2 (29)   | 8.4 (35)   | 7.2 (38)   | 6.2 (41)   |
| Missing                                                                      | 3.1 (69)    | 2.4 (6)    | 5.4 (19)   | 3.1 (13)   | 2.1 (11)   | 3.0 (20)   |
| Have you ever participated in any Quit Smoking Program, Service or Activity? |             |            |            |            |            |            |
| No                                                                           | 88.5 (1959) | 96.8 (241) | 92.7 (329) | 87.5 (363) | 86.0 (456) | 85.8 (570) |
| Yes                                                                          | 11.5 (254)  | 3.2 (8)    | 7.3 (26)   | 12.5 (52)  | 14.0 (74)  | 14.2 (94)  |

^ Excludes participants with other gender (N=9) to protect confidentiality.

\* Indicates a question where multiple responses are possible. This means that the column percentages may sum to more than 100%.

-- indicates a cell that was suppressed due to small numbers.

**Table S5. Smoking-related outcomes among past smokers^, overall and by gender and remoteness**

|                                                                  | Total Sample<br>N=2839<br>% (n) | By gender              |                          | By remoteness                 |                                  |                                  |                         |                              |                          |
|------------------------------------------------------------------|---------------------------------|------------------------|--------------------------|-------------------------------|----------------------------------|----------------------------------|-------------------------|------------------------------|--------------------------|
|                                                                  |                                 | Men<br>N=1224<br>% (n) | Women<br>N=1615<br>% (n) | Major City<br>N=1247<br>% (n) | Inner regional<br>N=859<br>% (n) | Outer regional<br>N=539<br>% (n) | Remote<br>N=73<br>% (n) | Very remote<br>N=92<br>% (n) | Missing<br>N=29<br>% (n) |
| Smoking attitudes                                                |                                 |                        |                          |                               |                                  |                                  |                         |                              |                          |
| Do you think your past smoking has made you sick?                |                                 |                        |                          |                               |                                  |                                  |                         |                              |                          |
| No                                                               | 44.9 (1276)                     | 40.4 (494)             | 48.4 (782)               | 45.2 (564)                    | 47.1 (405)                       | 43.4 (234)                       | 35.6 (26)               | 39.1 (36)                    | 37.9 (11)                |
| Yes                                                              | 24.3 (689)                      | 27.4 (335)             | 21.9 (354)               | 24.1 (301)                    | 22.2 (191)                       | 25.2 (136)                       | 30.1 (22)               | 32.6 (30)                    | 31.0 (9)                 |
| Unsure                                                           | 23.1 (655)                      | 23.2 (284)             | 23.0 (371)               | 23.7 (296)                    | 23.9 (205)                       | 21.9 (118)                       | 24.7 (18)               | 13.0 (12)                    | 20.7 (6)                 |
| Missing                                                          | 7.7 (219)                       | 9.1 (111)              | 6.7 (108)                | 6.9 (86)                      | 6.8 (58)                         | 9.5 (51)                         | 9.6 (7)                 | 15.2 (14)                    | 10.3 (3)                 |
| Do you think your past smoking will make you sick in the future? |                                 |                        |                          |                               |                                  |                                  |                         |                              |                          |
| Not at all                                                       | 27.2 (772)                      | 25.3 (310)             | 28.6 (462)               | 27.3 (341)                    | 27.9 (240)                       | 26.2 (141)                       | 23.3 (17)               | 30.4 (28)                    | 17.2 (5)                 |
| A little bit                                                     | 20.7 (587)                      | 20.3 (248)             | 21.0 (339)               | 21.1 (263)                    | 21.4 (184)                       | 18.9 (102)                       | 17.8 (13)               | 19.6 (18)                    | 24.1 (7)                 |
| A fair bit / A lot                                               | 12.8 (362)                      | 14.1 (173)             | 11.7 (189)               | 12.8 (160)                    | 12.6 (108)                       | 11.3 (61)                        | 20.5 (15)               | 15.2 (14)                    | 13.8 (4)                 |
| Unsure                                                           | 32.5 (922)                      | 32.6 (399)             | 32.4 (523)               | 32.4 (404)                    | 32.6 (280)                       | 34.7 (187)                       | 27.4 (20)               | 23.9 (22)                    | 31.0 (9)                 |
| Missing                                                          | 6.9 (196)                       | 7.7 (94)               | 6.3 (102)                | 6.3 (79)                      | 5.5 (47)                         | 8.9 (48)                         | 11.0 (8)                | 10.9 (10)                    | 13.8 (4)                 |
| How long ago did you quit?                                       |                                 |                        |                          |                               |                                  |                                  |                         |                              |                          |
| 1 to 5 months                                                    | 5.6 (160)                       | 4.8 (59)               | 6.3 (101)                | 5.1 (63)                      | 6.3 (54)                         | 5.0 (27)                         | --                      | 9.8 (9)                      | 10.3 (3)                 |
| 6 months to a year                                               | 3.5 (98)                        | 2.6 (32)               | 4.1 (66)                 | 3.4 (43)                      | 3.4 (29)                         | 3.5 (19)                         | --                      | --                           | 3.4 (1)                  |
| 1 to 2 years                                                     | 6.0 (170)                       | 4.7 (58)               | 6.9 (112)                | 6.8 (85)                      | 4.5 (39)                         | 5.0 (27)                         | 12.3 (9)                | 8.7 (8)                      | 6.9 (2)                  |
| 2 to 5 years                                                     | 10.4 (296)                      | 8.4 (103)              | 12.0 (193)               | 9.4 (117)                     | 10.6 (91)                        | 13.0 (70)                        | 11.0 (8)                | 9.8 (9)                      | 3.4 (1)                  |
| More than 5 years                                                | 66.9 (1898)                     | 70.2 (859)             | 64.3 (1039)              | 68.5 (854)                    | 68.8 (591)                       | 64.0 (345)                       | 54.8 (40)               | 54.3 (50)                    | 62.1 (18)                |
| Missing                                                          | 7.6 (217)                       | 9.2 (113)              | 6.4 (104)                | 6.8 (85)                      | 6.4 (55)                         | 9.5 (51)                         | 11.0 (8)                | 15.2 (14)                    | 13.8 (4)                 |
| What led you to quit?*                                           |                                 |                        |                          |                               |                                  |                                  |                         |                              |                          |
| Advertising against smoking                                      | 6.2 (175)                       | 6.5 (79)               | 5.9 (96)                 | 7.3 (91)                      | 4.9 (42)                         | 6.1 (33)                         | --                      | --                           | 6.9 (2)                  |
| Medical advice                                                   | 15.5 (439)                      | 19.8 (242)             | 12.2 (197)               | 13.6 (169)                    | 16.5 (142)                       | 17.8 (96)                        | 19.2 (14)               | 10.9 (10)                    | 27.6 (8)                 |
| My Health                                                        | 46.5 (1319)                     | 45.1 (552)             | 47.5 (767)               | 46.8 (584)                    | 47.5 (408)                       | 46.2 (249)                       | 42.5 (31)               | 39.1 (36)                    | 37.9 (11)                |
| Health of my family                                              | 18.0 (510)                      | 19.1 (234)             | 17.1 (276)               | 18.9 (236)                    | 17.6 (151)                       | 17.4 (94)                        | 16.4 (12)               | 14.1 (13)                    | 13.8 (4)                 |
| Cost                                                             | 28.4 (806)                      | 28.5 (349)             | 28.3 (457)               | 27.7 (346)                    | 30.8 (265)                       | 27.5 (148)                       | 24.7 (18)               | 28.3 (26)                    | 10.3 (3)                 |
| Pregnancy                                                        | 8.4 (239)                       | --                     | 14.5 (234)               | 9.7 (121)                     | 7.2 (62)                         | 8.2 (44)                         | --                      | --                           | 10.3 (3)                 |
| Too many non-smoking areas                                       | 1.8 (51)                        | 1.6 (20)               | 1.9 (31)                 | 1.4 (17)                      | 2.3 (20)                         | 1.9 (10)                         | --                      | --                           | 0 (0)                    |
| Pressure from family or friends                                  | 11.9 (338)                      | 12.2 (149)             | 11.7 (189)               | 13.5 (168)                    | 10.8 (93)                        | 10.8 (58)                        | 8.2 (6)                 | 9.8 (9)                      | 13.8 (4)                 |
| Other                                                            | 20.1 (572)                      | 19.9 (243)             | 20.4 (329)               | 19.9 (248)                    | 19.9 (171)                       | 20.6 (111)                       | 26.0 (19)               | 16.3 (15)                    | 27.6 (8)                 |
| Missing                                                          | 7.5 (212)                       | --                     | 5.9 (96)                 | 6.5 (81)                      | 5.8 (50)                         | 10.0 (54)                        | 12.3 (9)                | 16.3 (15)                    | 89.7 (26)                |
| What helped you quit?*                                           |                                 |                        |                          |                               |                                  |                                  |                         |                              |                          |
| Smoking program                                                  | 2.9 (83)                        | 2.4 (29)               | 3.3 (54)                 | 2.9 (36)                      | 3.3 (28)                         | 2.4 (13)                         | --                      | --                           | 6.9 (2)                  |
| Quitline                                                         | 1.5 (44)                        | 1.0 (12)               | 2.0 (32)                 | 1.8 (22)                      | 1.6 (14)                         | 1.3 (7)                          | --                      | --                           | 27.6 (8)                 |

|                                                                               |             |             |             |             |            |            |           |           |           |
|-------------------------------------------------------------------------------|-------------|-------------|-------------|-------------|------------|------------|-----------|-----------|-----------|
| Online support                                                                | 0.3 (8)     | 0.2 (2)     | --          | --          | 0.1 (1)    | --         | --        | --        | 0 (0)     |
| Health professional                                                           | 4.1 (117)   | 4.2 (51)    | 4.1 (66)    | 3.8 (47)    | 5.0 (43)   | 3.3 (18)   | --        | --        | 6.9 (2)   |
| Family or friends                                                             | 9.1 (257)   | 9.3 (114)   | 8.9 (143)   | 9.6 (120)   | 8.4 (72)   | 10.0 (54)  | --        | --        | 6.9 (2)   |
| Patches, gum, inhaler (NRT)                                                   | 9.3 (265)   | 9.6 (117)   | 9.2 (148)   | 10.2 (127)  | 10.8 (93)  | 6.3 (34)   | --        | --        | 13.8 (4)  |
| Stop smoking medication                                                       | 7.4 (209)   | 6.4 (78)    | 8.1 (131)   | 6.7 (84)    | 9.5 (82)   | 6.1 (33)   | --        | --        | 3.4 (1)   |
| Quit on my own                                                                | 65.8 (1868) | 66.1 (809)  | 65.6 (1059) | 66.3 (827)  | 63.2 (543) | 69.4 (374) | 63.0 (46) | 68.5 (63) | 51.7 (15) |
| Other                                                                         | 12.5 (354)  | 10.9 (133)  | 13.7 (221)  | 11.4 (142)  | 13.9 (119) | 13.9 (75)  | 9.6 (7)   | --        | 24.1 (7)  |
| Missing                                                                       | 0 (0)       | 0 (0)       | 0 (0)       | 0 (0)       | 0 (0)      | 0 (0)      | 0 (0)     | 0 (0)     | 0 (0)     |
| <b>Smoking behaviours</b>                                                     |             |             |             |             |            |            |           |           |           |
| How old were you when you started smoking?                                    |             |             |             |             |            |            |           |           |           |
| Under 15 years old                                                            | 47.5 (1349) | 50.2 (615)  | 45.4 (734)  | 48.4 (604)  | 50.8 (436) | 43.8 (236) | 38.4 (28) | 33.7 (31) | 48.3 (14) |
| 16-18 years old                                                               | 29.8 (845)  | 27.5 (337)  | 31.5 (508)  | 30.3 (378)  | 28.9 (248) | 30.4 (164) | 26.0 (19) | 32.6 (30) | 20.7 (6)  |
| 19-24 years old                                                               | 9.7 (276)   | 8.5 (104)   | 10.7 (172)  | 9.9 (123)   | 9.1 (78)   | 9.3 (50)   | 17.8 (13) | 9.8 (9)   | 10.3 (3)  |
| 25-34 years old                                                               | 3.3 (95)    | 2.9 (35)    | 3.7 (60)    | 3.5 (44)    | 2.6 (22)   | 3.7 (20)   | --        | --        | 6.9 (2)   |
| ≥35 years old                                                                 | 1.2 (34)    | 0.8 (10)    | 1.5 (24)    | 1.0 (12)    | 1.4 (12)   | 1.1 (6)    | --        | --        | 3.4 (1)   |
| Missing                                                                       | 8.5 (240)   | 10.0 (123)  | 7.2 (117)   | 6.9 (86)    | 7.3 (63)   | 11.7 (63)  | 11.0 (8)  | 18.5 (17) | 10.3 (3)  |
| When you used to smoke, how often did you smoke?                              |             |             |             |             |            |            |           |           |           |
| Less than weekly                                                              | 6.8 (194)   | 4.6 (56)    | 8.5 (138)   | 6.4 (80)    | 5.6 (48)   | 8.7 (47)   | 9.6 (7)   | 12.0 (11) | 3.4 (1)   |
| Weekly (not every day)                                                        | 11.2 (317)  | 9.2 (113)   | 12.6 (204)  | 11.0 (137)  | 8.7 (75)   | 14.1 (76)  | 16.4 (12) | 16.3 (15) | 6.9 (2)   |
| Every day                                                                     | 75.2 (2134) | 78.4 (960)  | 72.7 (1174) | 76.3 (952)  | 80.1 (688) | 68.8 (371) | 64.4 (47) | 58.7 (54) | 75.9 (22) |
| Missing                                                                       | 6.8 (194)   | 7.8 (95)    | 6.1 (99)    | 6.3 (78)    | 5.6 (48)   | 8.3 (45)   | 9.6 (7)   | 13.0 (12) | 13.8 (4)  |
| When you used to smoke, how many cigarettes did you usually smoke in one day? |             |             |             |             |            |            |           |           |           |
| 1-10 cigarettes per day                                                       | 39.7 (1128) | 29.2 (358)  | 47.7 (770)  | 41.7 (520)  | 37.5 (322) | 40.8 (220) | 38.4 (28) | 34.8 (32) | 20.7 (6)  |
| 11-20 cigarettes per day                                                      | 27.1 (768)  | 30.1 (369)  | 24.7 (399)  | 28.1 (350)  | 28.4 (244) | 23.9 (129) | 19.2 (14) | 28.3 (26) | 17.2 (5)  |
| 21-30 cigarettes per day                                                      | 15.6 (443)  | 19.6 (240)  | 12.6 (203)  | 14.8 (185)  | 17.3 (149) | 14.5 (78)  | 16.4 (12) | 10.9 (10) | 31.0 (9)  |
| ≥31 cigarettes per day                                                        | 8.8 (250)   | 11.2 (137)  | 7.0 (113)   | 7.7 (96)    | 9.9 (85)   | 9.3 (50)   | 13.7 (10) | --        | 17.2 (5)  |
| Missing or less than daily                                                    | 8.8 (250)   | 9.8 (120)   | 8.0 (130)   | 7.7 (96)    | 6.9 (59)   | 11.5 (62)  | 12.3 (9)  | --        | 13.8 (4)  |
| How soon after waking did you usually have your first cigarette?              |             |             |             |             |            |            |           |           |           |
| 5 minutes or less                                                             | 13.8 (393)  | 10.9 (134)  | 16.0 (259)  | 13.2 (164)  | 11.1 (95)  | 17.6 (95)  | 23.3 (17) | 19.6 (18) | 13.8 (4)  |
| 6-30 minutes                                                                  | 23.3 (662)  | 25.7 (314)  | 21.5 (348)  | 21.9 (273)  | 25.1 (216) | 23.9 (129) | 19.2 (14) | 21.7 (20) | 34.5 (10) |
| 31-60 minutes                                                                 | 26.7 (759)  | 26.8 (328)  | 26.7 (431)  | 28.7 (358)  | 27.1 (233) | 23.0 (124) | 28.8 (21) | 20.7 (19) | 13.8 (4)  |
| 61 or more minutes                                                            | 14.1 (399)  | 13.2 (162)  | 14.7 (237)  | 13.7 (171)  | 15.3 (131) | 14.3 (77)  | 11.0 (8)  | 7.6 (7)   | 17.2 (5)  |
| Don't smoke every day                                                         | 13.0 (370)  | 12.8 (157)  | 13.2 (213)  | 15.2 (189)  | 13.3 (114) | 9.1 (49)   | --        | 12.0 (11) | 10.3 (3)  |
| Missing                                                                       | 9.0 (256)   | 10.5 (129)  | 7.9 (127)   | 7.4 (92)    | 8.1 (70)   | 12.1 (65)  | --        | 18.5 (17) | 10.3 (3)  |
| Have you ever participated in any Quit Smoking Program, Service or Activity?  |             |             |             |             |            |            |           |           |           |
| No                                                                            | 94.2 (2673) | 95.1 (1164) | 93.4 (1509) | 95.5 (1191) | 92.4 (794) | 94.8 (511) | --        | --        | 82.8 (24) |
| Yes                                                                           | 5.8 (166)   | 4.9 (60)    | 6.6 (106)   | 4.5 (56)    | 7.6 (65)   | 5.2 (28)   | --        | --        | 17.2 (5)  |

^ Excludes participants with other gender (N=9) to protect confidentiality.

\* Indicates a question where multiple responses are possible. This means that the column percentages may sum to more than 100%.

-- indicates a cell that was suppressed due to small numbers.

**Table S6. Smoking-related outcomes among past smokers<sup>a</sup>, overall and by age group**

|                                                                  | Total Sample<br>N=2839<br>% (n) | By age group (years)    |                         |                         |                         |                        |
|------------------------------------------------------------------|---------------------------------|-------------------------|-------------------------|-------------------------|-------------------------|------------------------|
|                                                                  |                                 | 16-24<br>N=114<br>% (n) | 25-34<br>N=238<br>% (n) | 35-44<br>N=368<br>% (n) | 45-54<br>N=517<br>% (n) | ≥55<br>N=1602<br>% (n) |
| <b>Smoking attitudes</b>                                         |                                 |                         |                         |                         |                         |                        |
| Do you think your past smoking has made you sick?                |                                 |                         |                         |                         |                         |                        |
| No                                                               | 44.9 (1276)                     | 59.6 (68)               | 48.7 (116)              | 43.5 (160)              | 46.2 (239)              | 43.3 (693)             |
| Yes                                                              | 24.3 (689)                      | 11.4 (13)               | 23.9 (57)               | 24.7 (91)               | 21.5 (111)              | 26.0 (417)             |
| Unsure                                                           | 23.1 (655)                      | 21.1 (24)               | 21.0 (50)               | 26.6 (98)               | 25.1 (130)              | 22.0 (353)             |
| Missing                                                          | 7.7 (219)                       | 7.9 (9)                 | 6.3 (15)                | 5.2 (19)                | 7.2 (37)                | 8.7 (139)              |
| Do you think your past smoking will make you sick in the future? |                                 |                         |                         |                         |                         |                        |
| Not at all                                                       | 27.2 (772)                      | 34.2 (39)               | 28.2 (67)               | 25.3 (93)               | 24.8 (128)              | 27.8 (445)             |
| A little bit                                                     | 20.7 (587)                      | 20.2 (23)               | 30.7 (73)               | 26.4 (97)               | 22.4 (116)              | 17.4 (278)             |
| A fair bit / A lot                                               | 12.8 (362)                      | 8.8 (10)                | 10.9 (26)               | 11.7 (43)               | 9.7 (50)                | 14.5 (233)             |
| Unsure                                                           | 32.5 (922)                      | 30.7 (35)               | 26.1 (62)               | 31.8 (117)              | 36.4 (188)              | 32.5 (520)             |
| Missing                                                          | 6.9 (196)                       | 6.1 (7)                 | 4.2 (10)                | 4.9 (18)                | 6.8 (35)                | 7.9 (126)              |
| How long ago did you quit?                                       |                                 |                         |                         |                         |                         |                        |
| 1 to 5 months                                                    | 5.6 (160)                       | 28.1 (32)               | 13.0 (31)               | 8.4 (31)                | 5.4 (28)                | 2.4 (38)               |
| 6 months to a year                                               | 3.5 (98)                        | 16.7 (19)               | 9.2 (22)                | 4.6 (17)                | 2.3 (12)                | 1.7 (28)               |
| 1 to 2 years                                                     | 6.0 (170)                       | 22.8 (26)               | 17.2 (41)               | 6.8 (25)                | 4.4 (23)                | 3.4 (55)               |
| 2 to 5 years                                                     | 10.4 (296)                      | 18.4 (21)               | 20.2 (48)               | 15.2 (56)               | 10.6 (55)               | 7.2 (116)              |
| More than 5 years                                                | 66.9 (1898)                     | 7.0 (8)                 | 33.2 (79)               | 59.8 (220)              | 70.0 (362)              | 76.7 (1229)            |
| Missing                                                          | 7.6 (217)                       | 7.0 (8)                 | 7.1 (17)                | 5.2 (19)                | 7.2 (37)                | 8.5 (136)              |
| What led you to quit?*                                           |                                 |                         |                         |                         |                         |                        |
| Advertising against smoking                                      | 6.2 (175)                       | --                      | 5.0 (12)                | 6.0 (22)                | 7.0 (36)                | 6.2 (100)              |
| Medical advice                                                   | 15.5 (439)                      | 7.0 (8)                 | 9.7 (23)                | 9.0 (33)                | 13.9 (72)               | 18.9 (303)             |
| My Health                                                        | 46.5 (1319)                     | 36.8 (42)               | 46.6 (111)              | 53.5 (197)              | 45.5 (235)              | 45.8 (734)             |
| Health of my family                                              | 18.0 (510)                      | 13.2 (15)               | 20.6 (49)               | 20.9 (77)               | 20.9 (108)              | 16.3 (261)             |
| Cost                                                             | 28.4 (806)                      | 29.8 (34)               | 33.2 (79)               | 32.3 (119)              | 30.8 (159)              | 25.9 (415)             |
| Pregnancy                                                        | 8.4 (239)                       | 14.0 (16)               | 26.1 (62)               | 12.0 (44)               | 9.9 (51)                | 4.1 (66)               |
| Too many non-smoking areas                                       | 1.8 (51)                        | --                      | --                      | 1.6 (6)                 | 1.9 (10)                | 2.0 (32)               |
| Pressure from family or friends                                  | 11.9 (338)                      | 13.2 (15)               | 12.2 (29)               | 13.9 (51)               | 14.5 (75)               | 10.5 (168)             |
| Other                                                            | 20.1 (572)                      | 28.1 (32)               | 16.4 (39)               | 22.6 (83)               | 22.6 (117)              | 18.8 (301)             |
| Missing                                                          | 7.5 (212)                       | 6.1 (7)                 | --                      | 4.6 (17)                | 7.0 (36)                | 8.6 (138)              |
| What helped you quit?*                                           |                                 |                         |                         |                         |                         |                        |

|                                                                               |             |            |            |            |            |             |
|-------------------------------------------------------------------------------|-------------|------------|------------|------------|------------|-------------|
| Smoking program                                                               | 2.9 (83)    | --         | 2.9 (7)    | 4.3 (16)   | 2.7 (14)   | 2.8 (45)    |
| Quitline                                                                      | 1.5 (44)    | --         | --         | 3.3 (12)   | 1.9 (10)   | 1.3 (21)    |
| Online support                                                                | 0.3 (8)     | --         | --         | --         | --         | --          |
| Health professional                                                           | 4.1 (117)   | --         | 2.9 (7)    | 4.6 (17)   | 3.3 (17)   | 4.6 (74)    |
| Family or friends                                                             | 9.1 (257)   | 18.4 (21)  | 11.8 (28)  | 13.9 (51)  | 8.5 (44)   | 7.1 (113)   |
| Patches, gum, inhaler (NRT)                                                   | 9.3 (265)   | --         | 9.2 (22)   | 11.4 (42)  | 9.1 (47)   | 9.5 (152)   |
| Stop smoking medication                                                       | 7.4 (209)   | --         | 4.6 (11)   | 9.8 (36)   | 10.3 (53)  | 6.6 (105)   |
| Quit on my own                                                                | 65.8 (1868) | 76.3 (87)  | 68.9 (164) | 63.6 (234) | 65.4 (338) | 65.2 (1045) |
| Other                                                                         | 12.5 (354)  | 7.9 (9)    | 13.4 (32)  | 16.6 (61)  | 13.3 (69)  | 11.4 (183)  |
| Missing                                                                       | 0 (0)       | 0 (0)      | 0 (0)      | 0 (0)      | 0 (0)      | 0 (0)       |
| <b>Smoking behaviours</b>                                                     |             |            |            |            |            |             |
| How old were you when you started smoking?                                    |             |            |            |            |            |             |
| Under 15 years old                                                            | 47.5 (1349) | 43.9 (50)  | 44.5 (106) | 46.5 (171) | 49.9 (258) | 47.7 (764)  |
| 16-18 years old                                                               | 29.8 (845)  | 37.7 (43)  | 34.0 (81)  | 35.9 (132) | 26.9 (139) | 28.1 (450)  |
| 19-24 years old                                                               | 9.7 (276)   | 11.4 (13)  | 10.5 (25)  | 9.0 (33)   | 8.5 (44)   | 10.0 (161)  |
| 25-34 years old                                                               | 3.3 (95)    | --         | 2.9 (7)    | 2.7 (10)   | 6.2 (32)   | 2.9 (46)    |
| ≥35 years old                                                                 | 1.2 (34)    | --         | --         | --         | --         | 1.6 (25)    |
| Missing                                                                       | 8.5 (240)   | 7.0 (8)    | --         | --         | --         | 9.7 (156)   |
| When you used to smoke, how often did you smoke?                              |             |            |            |            |            |             |
| Less than weekly                                                              | 6.8 (194)   | 24.6 (28)  | 13.0 (31)  | 7.6 (28)   | 7.0 (36)   | 4.4 (71)    |
| Weekly (not every day)                                                        | 11.2 (317)  | 24.6 (28)  | 8.8 (21)   | 13.9 (51)  | 12.6 (65)  | 9.5 (152)   |
| Every day                                                                     | 75.2 (2134) | 46.5 (53)  | 71.8 (171) | 74.7 (275) | 73.3 (379) | 78.4 (1256) |
| Missing                                                                       | 6.8 (194)   | 4.3 (5)    | 6.3 (15)   | 3.8 (14)   | 7.2 (37)   | 7.7 (123)   |
| When you used to smoke, how many cigarettes did you usually smoke in one day? |             |            |            |            |            |             |
| 1-10 cigarettes per day                                                       | 39.7 (1128) | 71.9 (82)  | 59.7 (142) | 51.4 (189) | 43.1 (223) | 30.7 (492)  |
| 11-20 cigarettes per day                                                      | 27.1 (768)  | 13.2 (15)  | 24.8 (59)  | 26.6 (98)  | 25.0 (129) | 29.2 (467)  |
| 21-30 cigarettes per day                                                      | 15.6 (443)  | --         | 6.7 (16)   | 12.8 (47)  | 16.6 (86)  | 18.1 (290)  |
| ≥31 cigarettes per day                                                        | 8.8 (250)   | 11.4 (13)  | --         | 4.9 (18)   | 6.6 (34)   | 12.3 (197)  |
| Missing or less than daily                                                    | 8.8 (250)   | --         | --         | 4.3 (16)   | 8.7 (45)   | 9.7 (156)   |
| How soon after waking did you usually have your first cigarette?              |             |            |            |            |            |             |
| 5 minutes or less                                                             | 13.8 (393)  | 39.5 (45)  | 16.4 (39)  | 13.9 (51)  | 14.7 (76)  | 11.4 (182)  |
| 6-30 minutes                                                                  | 23.3 (662)  | 12.3 (14)  | 17.6 (42)  | 22.3 (82)  | 24.4 (126) | 24.8 (398)  |
| 31-60 minutes                                                                 | 26.7 (759)  | 22.8 (26)  | 31.1 (74)  | 31.3 (115) | 28.0 (145) | 24.9 (399)  |
| 61 or more minutes                                                            | 14.1 (399)  | 11.4 (13)  | 16.0 (38)  | 15.2 (56)  | 10.4 (54)  | 14.9 (238)  |
| Don't smoke every day                                                         | 13.0 (370)  | 7.9 (9)    | 11.8 (28)  | 12.5 (46)  | 14.7 (76)  | 13.2 (211)  |
| Missing                                                                       | 9.0 (256)   | 6.1 (7)    | 7.1 (17)   | 4.9 (18)   | 7.7 (40)   | 10.9 (174)  |
| Have you ever participated in any Quit Smoking Program, Service or Activity?  |             |            |            |            |            |             |
| No                                                                            | 94.2 (2673) | 94.7 (108) | 92.4 (220) | 94.0 (346) | 94.2 (487) | 94.4 (1512) |
| Yes                                                                           | 5.8 (166)   | 5.3 (6)    | 7.6 (18)   | 6.0 (22)   | 5.8 (30)   | 5.6 (90)    |

^ Excludes participants with other gender (N=9) to protect confidentiality.

\* Indicates a question where multiple responses are possible. This means that the column percentages may sum to more than 100.

-- indicates a cell that was suppressed due to small numbers.

**Table S7: Recoding of smoking-related attitudinal outcomes**

| Original variable                                                                                                                                                                                                                                                                                                                                                                                                               | Original coding                                                                | Binary recoding                                                     | Binary variable                                                                       | Binary key                   |
|---------------------------------------------------------------------------------------------------------------------------------------------------------------------------------------------------------------------------------------------------------------------------------------------------------------------------------------------------------------------------------------------------------------------------------|--------------------------------------------------------------------------------|---------------------------------------------------------------------|---------------------------------------------------------------------------------------|------------------------------|
| Do you agree that non-smokers miss out on gossip or yarning?                                                                                                                                                                                                                                                                                                                                                                    | Not at all<br>A little bit<br>A fair bit/A lot<br>Missing                      | 0=A little bit/a fair bit/a lot<br>1=Not at all<br>.=Missing        | Non-smokers do not miss out on gossip or yarning                                      | 0=Disagree<br>1=Agree        |
| Do you agree that your community disapproves of smoking?                                                                                                                                                                                                                                                                                                                                                                        | Not at all<br>A little bit<br>A fair bit/A lot<br>Missing                      | 0=Not at all<br>1=A little bit/a fair bit/a lot<br>.=Missing        | My community disapproves of smoking                                                   | 0=Disagree<br>1=Agree        |
| Do you agree that smoking is not that risky?                                                                                                                                                                                                                                                                                                                                                                                    | Not at all<br>A little bit<br>A fair bit/A lot<br>Missing                      | 0=A little bit/a fair bit/a lot<br>1=Not at all<br>.=Missing        | Smoking is risky                                                                      | 0=Disagree<br>1=Agree        |
| Do you think your smoking has made you sick?/ Do you think your past smoking will make you sick in the future?                                                                                                                                                                                                                                                                                                                  | No<br>Yes<br>Unsure<br>Missing                                                 | 0=No<br>1=Yes<br>.=Unsure/missing                                   | Smoking has made me sick/Past smoking has made me sick                                | 0=Disagree<br>1=Agree        |
| Do you think your smoking will make you sick in the future?/ Do you think your past smoking will make you sick in the future?                                                                                                                                                                                                                                                                                                   | Not at all<br>A little bit<br>A fair bit /A lot<br>Unsure<br>Missing           | 0=Not at all<br>1=A little bit/a fair bit/a lot<br>.=Unsure/missing | Smoking will make me sick in the future/ Past smoking will make me sick in the future | 0=Disagree<br>1=Agree        |
| Do you want to quit smoking? (current smokers only)                                                                                                                                                                                                                                                                                                                                                                             | Not at all<br>A little bit<br>A fair bit /A lot<br>Unsure<br>Missing           | 0=Not at all<br>1=A little bit/a fair bit/a lot<br>.=Unsure/missing | Wants to quit smoking                                                                 | 0=No<br>1=Yes                |
| Why do you want to quit?/What lead you to quit? (multi-selection)<br><ul style="list-style-type: none"> <li>• Advertising against smoking</li> <li>• Medical advice</li> <li>• My Health</li> <li>• Health of my family</li> <li>• Cost</li> <li>• Pregnancy</li> <li>• Too many non-smoking areas</li> <li>• Pressure from family or friends</li> <li>• Other</li> <li>• Missing or indicated does not want to quit</li> </ul> | Selected<br>Not selected                                                       | For each separate reason<br>0=Not selected<br>1=Selected            | As original variable for each separate reason                                         | 0=Not selected<br>1=Selected |
| How long ago did you quit? (past smokers only)                                                                                                                                                                                                                                                                                                                                                                                  | 1-5 months<br>6 months-1 year<br>1-2 years<br>2-5 years<br>>5 years<br>Missing | 0=> 5 years<br>1=≤5 years<br>.=Missing                              | Length of time since quitting                                                         | 0=>5years<br>1=≤5years       |
| What helped you quit?                                                                                                                                                                                                                                                                                                                                                                                                           | Selected<br>Not selected                                                       | For each separate support                                           | As original variable for each separate support                                        | 0=Not selected               |

|                                                                                                                                                                                                                                                                                                   |  |                              |  |            |
|---------------------------------------------------------------------------------------------------------------------------------------------------------------------------------------------------------------------------------------------------------------------------------------------------|--|------------------------------|--|------------|
| (multi-selection) (past smokers only)                                                                                                                                                                                                                                                             |  | 0=Not selected<br>1=Selected |  | 1=Selected |
| <ul style="list-style-type: none"> <li>Smoking program</li> <li>Quitline</li> <li>Online support</li> <li>Health professional</li> <li>Family or friends</li> <li>Patches, gum, inhaler (NRT)</li> <li>Stop smoking medication</li> <li>Quit on my own</li> <li>Other</li> <li>Missing</li> </ul> |  |                              |  |            |

**Table S8: Recoding of smoking-related behavioural outcomes**

| Original variable                                                                                                 | Original coding                                                                   | Binary recoding                                           | Binary variable                                                                         | Binary key    |
|-------------------------------------------------------------------------------------------------------------------|-----------------------------------------------------------------------------------|-----------------------------------------------------------|-----------------------------------------------------------------------------------------|---------------|
| Smoking status                                                                                                    | Never smoker<br>Current smoker<br>Past smoker<br>Missing                          | 0=Past/Never smokers<br>1=Current smokers<br>.=Missing    | Current smoker                                                                          | 0=No<br>1=Yes |
| Does anyone smoke in your home or in your car? (multi-selection)                                                  | No<br>Yes, inside the home<br>Yes, outside the home<br>Yes, in the car<br>Missing | For each separate question:<br>0=No<br>1=Yes<br>.=Missing | Anyone smokes in the home<br>Anyone smokes outside the home<br>Anyone smokes in the car | 0=No<br>1=Yes |
| How old were you when you started smoking?                                                                        | 1-15 years<br>16-18 years<br>19-24 years<br>25-34 years<br>≥35 years<br>Missing   | 0=>16 years<br>1=≤15 years<br>.=Missing                   | Age commenced smoking ≤15 years                                                         | 0=No<br>1=Yes |
| In the past year, have you tried to quit or reduce the amount you smoke? (multi-selection) (current smokers only) | Yes, tried to quit<br>Yes, tried to reduce<br>No<br>Missing                       | For each separate question:<br>0=No<br>1=Yes<br>.=Missing | Quit attempt in last 12 months<br>Reduction attempt in last 12 months                   | 0=No<br>1=Yes |
| How often do you smoke?/<br>When you used to smoke, how often did you smoke?                                      | Less than weekly<br>Weekly<br>Every day<br>Missing                                | 0=Less than weekly/weekly<br>1= Everyday<br>.=Missing     | Smokes daily/Smoked daily                                                               | 0=No<br>1=Yes |
| How many cigarettes do you usually smoke in one day (CPD)?/ When you used to smoke, how many CPD?                 | 1-10 CPD<br>11-20 CPD<br>21-30 CPD<br>≥31 CPD<br>Missing or <1                    | 0=<21 CPD<br>1=≥21 CPD<br>.=Missing or <1                 | Smoking ≥21 cigarettes per day                                                          | 0=No<br>1=Yes |

|                                                                                                                                   |                                                                                            |                              |                                    |               |
|-----------------------------------------------------------------------------------------------------------------------------------|--------------------------------------------------------------------------------------------|------------------------------|------------------------------------|---------------|
| How soon after waking do you usually have your first cigarette?/ How soon after waking did you usually have your first cigarette? | ≤5 minutes<br>6-30 minutes<br>31-60 minutes<br>>60 minutes<br>Don't smoke daily<br>Missing | 0=>5 minutes<br>1=≤5 minutes | Time to first cigarette ≤5 minutes | 0=No<br>1=Yes |
| Have you ever participated in any Quit Smoking Program, Service or Activity?                                                      | No<br>Yes                                                                                  | N/A                          | As original variable               | 0=No<br>1=Yes |

**Table S9: Associations between TIS exposure and smoking-related attitudes and behaviours in the total sample (includes current, past, and never smokers), adjusted for age, gender and remoteness**

|                                                  | PR adjusted for age, gender and remoteness (95%CI) |
|--------------------------------------------------|----------------------------------------------------|
| <b>Attitudes</b>                                 |                                                    |
| Non-smokers do not miss out on gossip or yarning |                                                    |
| Non-TIS                                          | 1 (Ref)                                            |
| TIS                                              | 1.01(0.98,1.04)                                    |
| My community disapproves of smoking              |                                                    |
| Non-TIS                                          | 1 (Ref)                                            |
| TIS                                              | 1.02(<1.00,1.06)                                   |
| Smoking is risky                                 |                                                    |
| Non-TIS                                          | 1 (Ref)                                            |
| TIS                                              | 1.01(0.97,1.06)                                    |
| <b>Behaviours</b>                                |                                                    |
| Current smoker                                   |                                                    |
| Non-TIS                                          | 1 (Ref)                                            |
| TIS                                              | 0.99(0.92,1.06)                                    |
| Anyone smokes in the home                        |                                                    |
| Non-TIS                                          | 1 (Ref)                                            |
| TIS                                              | 0.84(0.73,0.96)                                    |
| Anyone smokes outside the home                   |                                                    |
| Non-TIS                                          | 1 (Ref)                                            |
| TIS                                              | 0.97(0.89,1.06)                                    |
| Anyone smokes in the car                         |                                                    |
| Non-TIS                                          | 1 (Ref)                                            |
| TIS                                              | 0.89(0.77,1.03)                                    |

**Table S10. Associations between TIS exposure and smoking-related attitudes, among current and past smokers, adjusted for age, gender and remoteness**

| <b>Current smoker</b>                        |                                                    |
|----------------------------------------------|----------------------------------------------------|
|                                              | PR adjusted for age, gender and remoteness (95%CI) |
| Smoking has made me sick?                    |                                                    |
| Non-TIS                                      | 1 (Ref)                                            |
| TIS                                          | 1.03(0.91,1.11)                                    |
| Smoking will make me sick in the future      |                                                    |
| Non-TIS                                      | 1 (Ref)                                            |
| TIS                                          | 1.03(<1.00,1.06)                                   |
| Wants to quit smoking                        |                                                    |
| Non-TIS                                      | 1 (Ref)                                            |
| TIS                                          | 1.01(0.97,1.04)                                    |
| Reasons for wanting to quit                  |                                                    |
| Advertising against smoking                  |                                                    |
| Non-TIS                                      | 1 (Ref)                                            |
| TIS                                          | 0.66(0.40,1.09)                                    |
| Medical advice                               |                                                    |
| Non-TIS                                      | 1 (Ref)                                            |
| TIS                                          | 1.02(0.85,1.23)                                    |
| My Health                                    |                                                    |
| Non-TIS                                      | 1 (Ref)                                            |
| TIS                                          | 1.02(0.94,1.10)                                    |
| Health of my family                          |                                                    |
| Non-TIS                                      | 1 (Ref)                                            |
| TIS                                          | 1.04(0.90,1.21)                                    |
| Cost                                         |                                                    |
| Non-TIS                                      | 1 (Ref)                                            |
| TIS                                          | 1.01(0.92,1.10)                                    |
| Pregnancy                                    |                                                    |
| Non-TIS                                      | 1 (Ref)                                            |
| TIS                                          | 1.54(0.62,3.85)                                    |
| Too many non-smoking areas                   |                                                    |
| Non-TIS                                      | 1 (Ref)                                            |
| TIS                                          | 0.98(0.66,1.45)                                    |
| Pressure from family or friends              |                                                    |
| Non-TIS                                      | 1 (Ref)                                            |
| TIS                                          | 0.97(0.79,1.19)                                    |
| <b>Past smoker</b>                           |                                                    |
|                                              | PR adjusted for age, gender and remoteness (95%CI) |
| Past smoking has made you sick?              |                                                    |
| Non-TIS                                      | 1 (Ref)                                            |
| TIS                                          | 1.03(0.91,1.16)                                    |
| Past smoking will make me sick in the future |                                                    |
| Non-TIS                                      | 1 (Ref)                                            |
| TIS                                          | 1.04(0.95,1.14)                                    |
| What led you to quitting                     |                                                    |
| Advertising against smoking                  |                                                    |
| Non-TIS                                      | 1 (Ref)                                            |
| TIS                                          | 1.39(1.03,1.86)                                    |
| Medical advice                               |                                                    |
| Non-TIS                                      | 1 (Ref)                                            |
| TIS                                          | 0.96(0.81,1.15)                                    |
| My Health                                    |                                                    |
| Non-TIS                                      | 1 (Ref)                                            |
| TIS                                          | 1.01(0.93,1.10)                                    |
| Health of my family                          |                                                    |
| Non-TIS                                      | 1 (Ref)                                            |
| TIS                                          | 0.98(0.83,1.15)                                    |
| Cost                                         |                                                    |

|                                 |                  |
|---------------------------------|------------------|
| Non-TIS                         | 1 (Ref)          |
| TIS                             | 0.98(0.87,1.11)  |
| Pregnancy                       |                  |
| Non-TIS                         | 1 (Ref)          |
| TIS                             | 0.76(0.59,0.98)  |
| Too many non-smoking areas      |                  |
| Non-TIS                         | 1 (Ref)          |
| TIS                             | 1.18(0.67,2.05)  |
| Pressure from family or friends |                  |
| Non-TIS                         | 1 (Ref)          |
| TIS                             | 1.23(>1.00,1.52) |
| What helped you quit?*          |                  |
| Smoking program                 |                  |
| Non-TIS                         | 1 (Ref)          |
| TIS                             | 0.77(0.49,1.22)  |
| Quitline                        |                  |
| Non-TIS                         | 1 (Ref)          |
| TIS                             | 0.51(0.26,<1.00) |
| Online support                  |                  |
| Non-TIS                         | 1 (Ref)          |
| TIS                             | 0.58(0.11,2.91)  |
| Health professional             |                  |
| Non-TIS                         | 1 (Ref)          |
| TIS                             | 0.70(0.48,1.02)  |
| Family or friends               |                  |
| Non-TIS                         | 1 (Ref)          |
| TIS                             | 1.09(0.86,1.38)  |
| Patches, gum, inhaler (NRT)     |                  |
| Non-TIS                         | 1 (Ref)          |
| TIS                             | 1.06(0.83,1.34)  |
| Stop smoking medication         |                  |
| Non-TIS                         | 1 (Ref)          |
| TIS                             | 0.73(0.55,0.96)  |
| Quit on my own                  |                  |
| Non-TIS                         | 1 (Ref)          |
| TIS                             | 1.02(0.96,1.08)  |

**Table S11: Associations between TIS exposure and smoking-related behaviours, among current and past smokers, adjusted for age, gender and remoteness**

| <b>Current smokers</b>                                |                                                    |
|-------------------------------------------------------|----------------------------------------------------|
|                                                       | PR adjusted for age, gender and remoteness (95%CI) |
| Age commenced smoking ≤15 years                       |                                                    |
| Non-TIS                                               | 1 (Ref)                                            |
| TIS                                                   | 1.00(0.93,1.08)                                    |
| Quit attempt in last 12 months                        |                                                    |
| Non-TIS                                               | 1 (Ref)                                            |
| TIS                                                   | 1.02(0.93,1.12)                                    |
| Reduction attempt in last 12 months                   |                                                    |
| Non-TIS                                               | 1 (Ref)                                            |
| TIS                                                   | 1.01(0.93,1.11)                                    |
| Smokes daily                                          |                                                    |
| Non-TIS                                               | 1 (Ref)                                            |
| TIS                                                   | 1.04(>1.00,1.07)                                   |
| Smoking ≥21 cigarettes per day                        |                                                    |
| Non-TIS                                               | 1 (Ref)                                            |
| TIS                                                   | 0.81(0.63,1.04)                                    |
| Anyone smokes in the home                             |                                                    |
| Non-TIS                                               | 1 (Ref)                                            |
| TIS                                                   | 0.83(0.71,0.96)                                    |
| Time to first cigarette ≤5 minutes                    |                                                    |
| Non-TIS                                               | 1 (Ref)                                            |
| TIS                                                   | 0.88(0.76,1.02)                                    |
| Participation in any quit smoking program or activity |                                                    |
| Non-TIS                                               | 1 (Ref)                                            |
| TIS                                                   | 1.15(0.91,1.45)                                    |
| <b>Past smokers</b>                                   |                                                    |
|                                                       | PR adjusted for age, gender and remoteness (95%CI) |
| Age commenced smoking ≤15 years                       |                                                    |
| Non-TIS                                               | 1 (Ref)                                            |
| TIS                                                   | 0.95(0.88,1.02)                                    |
| Smoked daily                                          |                                                    |
| Non-TIS                                               | 1 (Ref)                                            |
| TIS                                                   | 0.99(0.96,1.02)                                    |
| Past smoking ≥21 cigarettes per day                   |                                                    |
| Non-TIS                                               | 1 (Ref)                                            |
| TIS                                                   | 0.91(0.80,1.03)                                    |
| Length of time since quitting <5years                 |                                                    |
| Non-TIS                                               | 1 (Ref)                                            |
| TIS                                                   | 1.05(0.95,1.17)                                    |
| Anyone smokes in the home                             |                                                    |
| Non-TIS                                               | 1 (Ref)                                            |
| TIS                                                   | 1.05(0.71,1.55)                                    |
| Past time to first cigarette <5 minutes               |                                                    |
| Non-TIS                                               | 1 (Ref)                                            |
| TIS                                                   | 0.95(0.83,1.09)                                    |
| Participation in any quit smoking program or activity |                                                    |
| Non-TIS                                               | 1 (Ref)                                            |
| TIS                                                   | 0.94(0.69,1.27)                                    |
